# Supplementary material for: A majority of Rhodobacter sphaeroides promoters lack a crucial RNA polymerase recognition feature, enabling coordinated transcription activation
Source: PubMed Central journal article supplement — Proc Natl Acad Sci U S A. 2020 Nov 9;117(47):29658–68. doi: 10.1073/pnas.2010087117 (PMC7703639; doi:10.1073/pnas.2010087117), 2020-11-09
Supplement: pnas.2010087117.sapp.pdf [file pnas.2010087117.sapp.pdf]

Supplementary Information for:

**A majority of *R. sphaeroides* promoters lack a crucial RNA polymerase recognition feature, enabling coordinated transcription activation**

Kemardo K. Henry, Wilma Ross, Kevin S. Myers, Kimberly C. Lemmer, Jessica M. Vera, Robert Landick, Timothy J. Donohue, Richard L. Gourse

Corresponding authors: Richard L. Gourse, Wilma Ross

Email: rgourse@bact.wisc.edu, weross@wisc.edu

This PDF file includes:

1. Expanded Materials and Methods
2. SI Tables

Table S1. Strains and plasmids used in this study.

Table S2. Oligonucleotides used to construct plasmid templates for in vitro transcription.

Table S3. Plasmids used for in vitro transcription.

Table S4. Primers used to construct chromosomally-encoded C-terminal thrombin-His10 tagged  $\beta'$ .

Table S5. Gene blocks used in this study.

Table S6. Primers used to construct pETSUMO-CarD.

### 3. SI Figures

Figure S1. RNAP purification.

Figure S2. Transcription of non-*R. sphaeroides* promoters by RNAP<sub>Rsp</sub>.

Figure S3: *R. sphaeroides* rRNA promoter sequences.

Figure S4. Housekeeping  $\sigma$  and  $\alpha$ CTD alignments.

Figure S5. Alignments of CarD, activation by wild-type or W91L mutant CarD<sub>Rsp</sub>, and transcription from *R. sphaeroides* *rrnB* -11 mutant promoters.

Figure S6. In vitro transcription from *R. sphaeroides* *rrnA* wild-type and spacer mutant promoters.

Figure S7. *R. sphaeroides* promoter sequences.

Figure S8. Relative levels of CarD<sub>Rsp</sub> and CFU/ml in *R. sphaeroides* cultures during aerobic growth.

### 4. Legend for Dataset S1

### 5. SI References

### 6. Other supplementary materials for this manuscript: Dataset S1

## 1. Expanded Materials and Methods

**Bacterial strains and growth conditions.** Bacterial strains are listed in Table S1. *E. coli* strains were grown at 37°C in either LB Lennox media or on LB agar plates supplemented with kanamycin (30 µg/mL) or chloramphenicol (20 µg/mL) when required. *R. sphaeroides* 2.4.1 strains were grown in succinate-based minimal medium (SIS) (1) at 30°C with kanamycin 25 µg/mL or sucrose (10%) when appropriate. For liquid growth conditions, *R. sphaeroides* 2.4.1 was grown in 500 mL cultures with constant sparging with 69% N<sub>2</sub>, 30% O<sub>2</sub> and 1% CO<sub>2</sub> at 30°C for aerobic growth. For aerobic growth curves, samples were removed from the main culture under positive pressure, optical density was determined at OD<sub>600</sub>, and viable cell counts were determined by plating on solid minimal medium.

**Construction of chromosomally encoded *R. sphaeroides* His10-β'.** For purification of RNAP by Ni-NTA chromatography, a thrombin-His10 tag was constructed in frame with the C-terminus of the RNAP β' subunit and introduced into wild-type *R. sphaeroides* 2.4.1 using the non-replicative plasmid pk18mobsacB (2) and a two-step recombination method, and the primers are listed in Table S4.

First, a 3 kb fragment containing 1.5 kb of sequence flanking either side of the stop codon of *rpoC* was PCR amplified from chromosomal DNA with primers RLG7576 and RLG7577. The pk18mobsacB vector was PCR linearized with oligonucleotides RLG7578 and RLG7579 that contained sequence overlapping the 3 kb fragment. The 3 kb fragment was then joined to linearized pk18mobsacB by HiFi Assembly (NEB) to

form pRLG14688. Insertion of the 3 kb fragment into pk18mobsacB was confirmed with primers RLG7584 and RLG7585.

Next, pRLG14688 was linearized by performing PCR with outward directed primers RLG7594 and RLG7589 lacking the *rpoC* stop codon. The thrombin-His10 tag was produced by annealing complementary oligonucleotides RLG7588 and RLG7589, which were then extended by PCR to create a 130 bp fragment with sequence overlapping the arms of linearized pRLG14688. This fragment was then joined to linearized RLG14688 by Hi-Fi Assembly to create pRLG14713. The resulting plasmid was verified by PCR with primers that annealed to the thrombin-His10 coding sequence (RLG7598) and within the *rpoC* gene (RLG7431) and then sequenced using the oligonucleotides listed in Table S4.

pRLG14713 was conjugated into *R. sphaeroides* 2.4.1 using *E. coli* S17-1 as a donor. Strains containing single crossovers were selected for kanamycin resistance, indicating integration of the pk18mobsacB into the *rpoC* locus. Double crossovers were then selected for the loss of sucrose sensitivity on agar plates containing sucrose (10%), and strains containing the thrombin-His10 coding sequence were identified by PCR using primers RLG7598 and RLG7431. The genomic region flanking the site of homologous recombination was PCR amplified using oligonucleotides RLG7511 and RLG7654, and the PCR fragment was sequenced. Glycerol stocks of the resulting strain RLG14765 were made from single colonies and stored at -80°C.

**Purification of *R. sphaeroides* RNAP Holoenzyme.** *R. sphaeroides* holoenzyme was purified using Ni-agarose affinity chromatography from aerobically grown cells containing the chromosomally encoded His10- $\beta'$  (RLG14765). Cells were harvested at OD<sub>600</sub> ~0.5-0.6 (log phase), and cell pellets were resuspended in Bugbuster (Novagen), 5 mL of Bugbuster per gram of wet cell, supplemented with 5  $\mu$ L per gram Lysonase (Novagen), 1X HALT protease inhibitor (ThermoFisher Scientific), and 23  $\mu$ g/mL phenylmethylsulfonyl fluoride (PMSF). After incubation at room temperature with gentle rocking for 1 hour, cell debris was removed by centrifugation at 14,000 RPM for 20 min at 4°C, and the cleared lysate was then added to a 1 mL Ni-NTA resin column (Qiagen) pre-equilibrated with RNAP wash buffer (50 mM NaH<sub>2</sub>PO<sub>4</sub> [pH 8], 300 mM NaCl, 20 mM imidazole, 5% glycerol, 0.1% Tween 20, and 5 mM  $\beta$ -mercaptoethanol). After washing the column with RNAP wash buffer, RNAP was eluted with wash buffer containing 300 mM imidazole, dialyzed twice into 2X RNAP storage buffer (10 mM Tris-Cl [pH 8.0], 100 mM KCl, 10 mM MgCl<sub>2</sub>, 0.1 mM EDTA, 1 mM DTT, 20  $\mu$ M ZnCl<sub>2</sub>) at 4°C, and concentrated using a 5 mL spin concentrator (Sartorius) with a 5 kDa molecular weight cutoff. An equal volume of 100% glycerol was added, and the protein concentration was assayed using the Bradford reagent (Bio-Rad) using BSA as a standard. Proteins were stored at -20°C. Native *E. coli* holo-RNAP was purified as described (3). *R. sphaeroides*  $\sigma^{93}$  was a gift from K. Wassarman (UW-Madison).

As is often observed with RNAP preparations made this way, a small number of other proteins co-purified with the *R. sphaeroides* RNAP. These proteins are present in very low, substoichiometric amounts compared to the other subunits (see Figure S1) and

could have co-purified with the RNAP due to weak interactions with RNAP itself (e.g. they could represent true RNAP-associated factors), or they could have co-purified because of affinity for the N-NTA agarose column matrix. Attempts to purify the *R. sphaeroides* RNAP further by heparin-sepharose chromatography were not successful. Although we cannot exclude the possibility that these proteins could influence transcription, they should not affect the interpretation of the results reported here, which in almost all cases compare the effects of the same RNAP preparation on different promoters or the effects of CarD on the same RNAP preparation.

**Construction, overexpression, and purification of SUMO-tagged CarD wild-type and variant proteins.** The *R. sphaeroides carD* gene was cloned into the pETSUMO vector for overexpression and purification from *E. coli* BL21 using its IPTG-inducible T7 promoter. The coding sequence of CarD (*rsp\_2425*) was produced as a codon optimized gene block (Table S5) from GeneArt (Life Technologies). CarD was PCR amplified from the gene block with primers RLG7660 and RLG7661 (Table S6) containing sequence homology to pETSUMO that had been linearized with oligonucleotides RLG7369 and RLG7659. The two DNA fragments were joined by Hi-Fi Assembly (NEB), electroporated into *E. coli* XL1-blue cells, and grown on LB supplemented with kanamycin (30 µg/mL). Plasmids with the correct insert were identified by PCR with oligonucleotides RLG4583 and RLG7386 and then sequenced with the oligonucleotides listed in Table S6. The resulting plasmid (pRLG15433) created an Ulp1 cleavable His<sub>10</sub>-SUMO tag on the N-terminus of CarD. Substitutions were

introduced by Multi-site Lightning QuikChange (Agilent) using oligonucleotides listed in Table S6 and verified by sequencing.

His10-SUMO-tagged CarD was overexpressed from BL21 (DE3) pLysS cells transformed with pETSUMO coding for CarD or CarD variants. Transformed cells were grown in 500 mL of LB containing kanamycin and chloramphenicol inoculated from an overnight culture to a starting OD<sub>600</sub> of 0.05. Cultures were grown at 37°C to OD<sub>600</sub> of 0.5-0.6, induced with 1 mM IPTG for 3-4 hr, and purified by Ni-NTA chromatography as described (4). Cell pellets were resuspended in 25 mL of lysis buffer (20 mM Tris-Cl pH 8, 500 mM NaCl, 10% glycerol (vol/vol), 0.5 mM β-mercaptoethanol), PMSF (23 μg/ml), 0.08% sodium deoxycholate and 1X HALT protease inhibitor cocktail (ThermoFisher Scientific), and lysed by sonication. Cell debris was pelleted by centrifugation at 15,000 RPM for 30 min at 4°C, and the cleared lysate was filtered through a 0.45 μm filter added to a 0.5 mL Ni-NTA agarose resin (Qiagen) pre-equilibrated with lysis buffer. The protein-Ni-NTA column was washed with lysis buffer containing 25 mM imidazole, and the protein was eluted with lysis buffer containing 300 mM imidazole. The concentration of the eluted His10-SUMO-tagged CarD was determined using the Bradford assay reagent with bovine serum albumen (BSA) as a standard. The His10-SUMO tag was removed by incubating the eluted His10-SUMO-tagged CarD with His8-Ulp1 protease at a mass ratio of 400:1 (His10-SUMO-tagged CarD to Ulp1 protease) and dialyzed against Ulp1 cleavage buffer (20 mM Tris (pH 8), 150 mM NaCl, and 1 mM β-mercaptoethanol) at 4°C overnight. Free His10-SUMO and His8-Ulp1 protease were removed by passage through a ~300 μL Ni-NTA column. The flow-through containing

untagged CarD was dialyzed overnight against CarD storage buffer (20 mM Tris-HCl [pH 8.0], 100 mM NaCl, 2 mM DTT, 50% glycerol). Protein concentration was assayed by the Bradford assay. Proteins were stored at -20°C. For in vitro transcription assays, CarD was diluted into CarD storage buffer to the desired concentration.

We cannot eliminate the possibility that the reduction in activity of the CarD mutant proteins in our studies (and in previous studies on CarD) resulted from general folding defects. We also note that we could not compare the effects of the triple substitution, CarD<sub>Rsp</sub> variant Q31A, I33A, R53A, corresponding to *T. thermophilus* CarD<sub>Mtb</sub> RID domain residues R25, I27, and R47, to those of an analogous triple RID substitution in *T. thermophilus* CarD, because a triple substitution variant was not constructed in previous studies.

**Construction of in vitro transcription templates.** *R. sphaeroides* promoter fragments were PCR amplified from *R. sphaeroides* 2.4.1 chromosomal DNA and inserted into pRLG770 (5) using the oligonucleotides listed in Table S2. Each oligonucleotide set created promoter fragments with the described endpoints relative to the predicted transcription start site based on the presence of predicted -10 and -35 elements. The resulting promoter fragments contained sequences for ligation to linearized pRLG770 (amplified using oligonucleotides RLG7057 and RLG7056) by Hi-Fi Assembly (NEB). Plasmids were electroporated into *E. coli* XL1-blue, and those confirmed to have the correct insert size on gels were sequenced with oligonucleotides RLG4252 and RLG4253. Promoter variants were created by Multi-site Lightning QuikChange (Agilent)



as described above using the mutagenic primers listed in Table S2. Promoter insertions in pRLG15507 and pRLG15543 (Table S5) were gene blocks from IDT that were ligated to linearized pRLG770. pRLG770 and its derivatives all contain the promoter and gene coding for the RNA I transcript, a naturally occurring product of ColE1 plasmids from which these plasmids derive. The RNA I promoter is located within the plasmid replication control region, and makes RNA I, an antisense regulatory RNA that controls the primer for DNA replication, RNA II (6). pRLG15474 containing the *T7A1lacO34* promoter was amplified from pIND4 (a replicable plasmid used for protein overexpression in *R. sphaeroides*) (7). *T7A1lacO34* is sometimes referred to as *T7A1lacO-1* (8). Plasmid DNA was purified from *E. coli* XL1-blue by miniprep (Qiagen), phenol extracted, diluted to 200 ng/μL in 10 mM Tris-HCl (pH 8.0), and stored at -20°C.

**in vitro transcription.** Multiple round transcription assays were carried out on supercoiled plasmid templates containing the promoters listed in Table S3 using *R. sphaeroides* RNAP (20-50 nM) or *E. coli* RNAP (10 nM) in 25 μL reactions. Template DNA (5 pmol or 400 ng) was incubated in transcription buffer (20 mM Tris-HCl [pH 7.9], 10 mM MgCl<sub>2</sub>, 1 mM DTT, 0.1 mg/ml BSA, and either 170 or 100 mM NaCl, as indicated, containing NTPs (200 μM ATP, GTP, CTP, 10 μM UTP, and 1.2 μCi α-<sup>32</sup>P UTP [Perkin Elmer]) with CarD or CarD storage buffer as indicated at room temperature for 10 min. Transcription was initiated by addition of RNAP and reactions were incubated at 30°C for 20 min. The reactions were terminated by addition of 25 μL water-saturated phenol, aqueous and phenol phases were separated by brief centrifugation, and 16 μL of the aqueous phase containing the transcript was transferred to 16 μL 2X

loading solution (8 M urea, 10 mM EDTA, 2X TBE, 1% SDS and 0.02% bromophenol blue). Transcripts were denatured by heating the samples at 95°C for 1 min, resolved on 6% polyacrylamide 7M urea gels, imaged using a Typhoon phosphorimager, and quantified with ImageQuant 5.2 software.

**Western blot analysis.** *R. sphaeroides* cells were harvested from aerobically grown cultures at the OD<sub>600</sub> indicated. Separate cultures were grown for each of the three growth phases, outgrowth, log, and stationary (Figs. 7 and S8). For outgrowth cultures, an aliquot of a stationary phase culture (OD<sub>600</sub> ~3.5) was diluted 1:12.5 into fresh minimal medium to a starting OD<sub>600</sub> of 0.25 at time 0, and samples were removed at the indicated times (from t=0 to 7 h). For the log phase culture, an aliquot of a stationary phase culture was diluted 1:50 to a starting OD<sub>600</sub> of 0.02 into fresh medium at time 0, the culture was grown for 10 hr to an OD<sub>600</sub> of ~0.2 before sampling, and samples were then collected at intervals from 10 to 18 hr, during which time the culture grew exponentially. For the stationary culture experiment, the culture was inoculated from a stationary phase culture to a starting OD<sub>600</sub> of ~0.013 at t=0 and was sampled at times between 15 to 45 h, during which it entered and continued through stationary phase.

At the indicated OD<sub>600</sub>, 2 OD equivalents of cells were pelleted, resuspended in 200 µL Laemmli loading buffer (75 mM Tris-HCl [pH 8], 2% SDS, 0.5 M β-mercaptoethanol, 10% glycerol, 0.2% Triton X100, 0.02% bromophenol blue), and heated at 95°C for 10 min. The whole cell lysates were cleared by brief centrifugation, and aliquots (10 µL/lane or 0.1 OD<sub>600</sub> equivalent) and purified standards were separated on 12%

NuPAGE Bis-Tris gels (Invitrogen) in MES buffer. Proteins were then transferred onto a nitrocellulose membrane (GE Healthcare). The section of the membrane containing the CarD band was incubated for 2 hr with a primary antibody against CarD (rabbit polyclonal antibody raised against untagged CarD; Covance Research Products), and the section containing the  $\alpha$  subunit of RNAP was incubated for 1 hr with a primary antibody against  $\alpha$  at a 1:10,000 dilution at room temperature in blocking buffer (phosphate buffered saline [pH 7.4], 0.1% Tween20 (PBST) and 5% dried milk). In Fig. S1B, sections of the membrane were incubated with antibodies against the  $\sigma^{70}$  or the  $\alpha$  subunits of RNAP to determine if the *R. sphaeroides* RNAP contained  $\sigma^{93}$  (with which the *E. coli* anti- $\sigma^{70}$  cross reacts). The membranes were subsequently washed 3 times with PBST and then incubated with secondary antibody (goat anti-rabbit IgG horseradish peroxidase conjugate [Promega]; added at 1:10,000) for 1 hr in blocking buffer. The membrane was then washed 3 times with PBST again, incubated in SuperSignal West Dura Extended Duration Substrate (Thermo Scientific), and bands were detected with a LI-COR Odyssey Fc Imaging System. The intensity of each band was quantified using Image Studio Lite software (LI-COR). Polyclonal antibodies to the  $\alpha$  subunit of *R. sphaeroides* RNAP (WI515) and  $\sigma^{70}$  (WI168) were gifts from Karen Wassarman (University of Wisconsin-Madison). CarD protein concentrations in the whole cell lysate were determined from a standard curve.

**Viable cell counts.** *R. sphaeroides* colony forming units (CFU) were determined by 10-fold serially diluting cultures into 1X M9 salts at the OD<sub>600</sub> indicated and plating 10  $\mu$ L (in triplicate) onto 1X SIS agar plate. Viable cells were scored after 48-96 hr at 30°C. The

number of viable cells loaded/lane (CFU/lane) was determined by dividing the CFU by the respective OD<sub>600</sub> value multiplied by 0.1 (the OD<sub>600</sub> equivalent loaded per lane).

**Determination of CarD concentration in cells.** The molar concentration of CarD in log phase cells was calculated from the number of moles of CarD in the samples, as determined from Western blots with purified CarD standards using a molecular weight of 19.045 g/mol for CarD, the number of cells per sample (CFU) determined from viable cell counts, and the volume of a log phase aerobically grown *R. sphaeroides* cell (0.87 μm<sup>3</sup> per CFU) (9).

**Bioinformatic analysis of transcription start sites and promoter elements.**

Total *R. sphaeroides* RNA was extracted from separate cultures grown to mid-log phase aerobically or anaerobically, as described in the “Bacterial strains and growth conditions” section above and in reference (9). The RNA was then processed as described in reference (10), and transcription start sites (TSSs) were identified as described in reference (11). Both the anaerobic and aerobic sets of TSSs were then combined for promoter analysis. All TSSs were included for identification of promoter elements; the search did not exclude promoters used by holoenzymes containing sigma factors other than the major sigma,  $\sigma^{93}$  in *R. sphaeroides*. However, since most alternative sigmas are produced or activated only under specific stress conditions, most of promoters identified under the mid-log growth conditions we used would be expected to correspond to those utilizing  $\sigma^{93}$  holoenzyme.

For Fig. 6, we searched for probable -10 elements by analyzing the DNA sequences from -19 to -5 relative to each TSS (+1) using MEME version 5.1.0 (12) (“zoops” method, minimum width of 9 bp, maximum width of 10 bp, no palindromic sequence). TA motifs (corresponding to positions most frequently found at -12 and -11 at the upstream end of *E. coli* -10 elements) were identified in 763 putative promoters. The TA motifs were not required to be positioned at -12 and -11 relative to the TSS, since the spacing between the -10 hexamer and the TSS can vary. The base at position -7 in *R. sphaeroides* promoters was identified relative to the position of the TA motif. In cases where there were multiple closely-spaced TSSs associated with the same -10 element (~9% of genes), only one -10 element was used for quantitation of the percentage of -7T and extended -10 elements in the population. In cases where there was more than one TSS associated with the same gene, but they were not close together, the corresponding -10 elements for each putative promoter were included in the analysis. Since the genome of *R. sphaeroides* does not contain a gene coding for a  $\sigma^S$  homolog (13), and alternative holoenzymes (at least in *E. coli*) do not contain a TA motif at the upstream end of their -10 elements, the promoter collection analyzed in Fig. 6 for -7T and extended -10 elements likely consists primarily of  $\sigma^{93}$ -dependent promoters.

The -10 elements in our promoter library were separated into two groups based on the identity of the base at position -7, one group with -7T and the other with -7A/G/C combined. The percentage of promoters containing -7T, extended -10 elements, or both was determined for each species in Fig. 6 using published TSS information. The list of all *R. sphaeroides* TSSs, indicating those with probable -7T and extended -10 sequences, is provided as Dataset S1. We note that the number of *R. sphaeroides* promoters identified by MEME in our analysis is an underestimate of the true number of *R. sphaeroides* promoters, because we specified -10 elements with both a T at -12 and an A at -11. The same methods were used to calculate the percentages of promoters with -7T, extended -10 elements, or both for each bacterial species shown in Fig. 6. The sources of the TSS data used for this purpose were *R. sphaeroides* (11), *C. crescentus* (14), *Z. mobilis* (10), *E. coli* (15), *B. subtilis* (16), *M. smegmatis* (17), *S. coelicolor* (18), and *B. cenocepacia* (19). Using our criteria, we estimate that ~65% of the TSSs were included in the analyses of -10 elements from each species.

**Table S1. Strains and plasmids used in this study**

| <b>Strains</b>           | <b>Genotype</b>                                                                                                                                                                                                                                                                                                | <b>Source</b> |
|--------------------------|----------------------------------------------------------------------------------------------------------------------------------------------------------------------------------------------------------------------------------------------------------------------------------------------------------------|---------------|
| BL21 (DE3)<br>pLysS      | <i>E. coli</i> str. B F <sup>-</sup> <i>ompT gal dcm lon hsdS<sub>B</sub>(r<sub>B</sub><sup>-</sup> m<sub>B</sub><sup>-</sup>)</i> λ(DE3 [ <i>lacI lacUV5-T7p07 ind1 sam7 nin5</i> ]) [ <i>malB</i> <sup>+</sup> ] <sub>K-12</sub> (λ <sup>S</sup> ) pLysS[T7p20 <i>ori<sub>p15A</sub></i> ](Cm <sup>R</sup> ) | Novagen       |
| <i>E. coli</i> S17-1     | TpR SmR <i>recA, thi, pro, hsdR-M+RP4: 2-Tc:Mu: Km Tn7 λpir</i>                                                                                                                                                                                                                                                | (20)          |
| <i>E. coli</i> XL1-Blue  | Δ( <i>mcrA</i> )183 Δ( <i>mcrCB-hsdSMR-mrr</i> )173 <i>endA1 supE44 thi-1 recA1 gyrA96 relA1 lac [F' proAB lacI<sup>q</sup>ZΔM15 Tn10 (Tet<sup>r</sup>)]</i>                                                                                                                                                   | Stratagene    |
| <i>E. coli</i> XL10-Gold | <i>endA1 glnV44 recA1 thi-1 gyrA96 relA1 lac Hte</i> Δ( <i>mcrA</i> )183 Δ( <i>mcrCB-hsdSMR-mrr</i> )173 <i>tet<sup>r</sup> F'[proAB lacI<sup>q</sup>ZΔM15 Tn10(Tet<sup>R</sup> Amy Cm<sup>R</sup>)]</i>                                                                                                       | Stratagene    |
| RLG14946                 | <i>Rhodobacter sphaeroides</i> 2.4.1 (Wild type lab strain)                                                                                                                                                                                                                                                    |               |
| RLG14765                 | RLG14946 with a C-terminal thrombin-His <sub>10</sub> chromosomally tagged β' ( <i>rpoC</i> )                                                                                                                                                                                                                  | This study    |

| <b>Plasmids</b> | <b>Description</b>                                                                                                                               | <b>Source</b>  |
|-----------------|--------------------------------------------------------------------------------------------------------------------------------------------------|----------------|
| pRLG770         | Transcription vector                                                                                                                             | (21)           |
| pETSUMO         | pET derived plasmid that encodes a Ulp1 cleavable His <sub>10</sub> SUMO tag. ORFs are cloned in frame with the coding sequence of the SUMO tag. | Invitrogen (4) |
| pK18mobsacB     | Mobilization plasmid used for making chromosomal insertion into <i>R. sphaeroides</i> chromosome                                                 | (2)            |

**Table S2. Oligonucleotides used to construct plasmid templates for in vitro transcription**

**Primers for linearizing RLG770**

| Oligonucleotide | Sequence                      |
|-----------------|-------------------------------|
| 7057            | 5'-AAGCTTGGGTCCCACCTGACC-3'   |
| 7058            | 5'-GAATTCTTGAAGACGAAAGGGCC-3' |

**Primers for screening and sequencing promoters inserted into RLG770**

| Oligonucleotide | Sequence                    |
|-----------------|-----------------------------|
| 4252            | 5'-CCCGAAAAGTGCCACCTGACG-3' |
| 4253            | 5'-CAGTTCCTACTCTCGCATGG-3'  |

**Primers to construct *in vitro* transcription plasmids**

(both forward and reverse primers)

| Plasmid   | Oligo | Sequence                                                 | Description                                                                             |
|-----------|-------|----------------------------------------------------------|-----------------------------------------------------------------------------------------|
| pRLG14562 | 7411  | GGCCCTTTCGTCTTCAAGAATTC<br>GATCCGGCGGATGGGAGCGGC         | <i>R. sphaeroides</i><br><i>rrnA</i> promoter,<br>-320 to +50                           |
|           | 7412  | GGTCAGGTGGGACCCAAGCTTG<br>GCAGCACCGCCGCCTCTCAAC          |                                                                                         |
| pRLG14564 | 7413  | GGCCCTTTCGTCTTCAAGAATTC<br>CCGCGAGCGGCTGACCGG            | <i>R. sphaeroides</i><br><i>rrnB</i> promoter,<br>-230 to +50                           |
|           | 7415  | GGTCAGGTGGGACCCAAGCTTCT<br>GTCATCCGCTCCCTCGTCTCCGT<br>CC |                                                                                         |
| pRLG14566 | 7416  | GGCCCTTTCGTCTTCAAGAATTC<br>GCCGTCTCGAGGGGGATCTGGA<br>G   | <i>R. sphaeroides</i><br><i>rrnC</i> promoter,<br>-270 to +50                           |
|           | 7412  | GGTCAGGTGGGACCCAAGCTTG<br>GCAGCACCGCCGCCTCTCAAC          |                                                                                         |
| pRLG15054 | 8008  | GGCCCTTTCGTCTTCAAGAATTC<br>CATCCTGACGGAATGGGGCATC        | <i>R. sphaeroides</i><br><i>prpA</i> promoter,<br>-379 to +51                           |
|           | 8009  | GGTCAGGTGGGACCCAAGCTTA<br>GTTCGAATACCAGATCCTCAGCC        |                                                                                         |
| pRLG15224 | 8026  | GGCCCTTTCGTCTTCAAGAATTC<br>GGGCTGGCCCTTCTGGGATTTG        | <i>R. sphaeroides</i><br><i>rpsL</i> promoter,<br>-132 to +65                           |
|           | 8136  | GGTCAGGTGGGACCCAAGCTTG<br>CCCGGATCATGACCACTACAG          |                                                                                         |
| pRLG15228 | 8028  | GGCCCTTTCGTCTTCAAGAATTCT<br>CATCGGCTACTACTATGCCAAGG      | <i>R. sphaeroides</i><br><i>rpsM</i> promoter,<br>-156 to +50                           |
|           | 8143  | GGTCAGGTGGGACCCAAGCTTG<br>ACTGTTCCGCCGAGGACAAAACC        |                                                                                         |
| pRLG15227 | 8141  | GGCCCTTTCGTCTTCAAGAATTC<br>GTTGATGGCGGGCGATCTCGAG        | <i>R. sphaeroides</i><br><i>tRNA<sup>trp</sup></i> RSP_4298<br>promoter, -106 to<br>+56 |
|           | 8142  | GGTCAGGTGGGACCCAAGCTTCA<br>CGACCCTCGTTTTGGAGACC          |                                                                                         |



|           |      |                                                           |                                                                                                                                                      |
|-----------|------|-----------------------------------------------------------|------------------------------------------------------------------------------------------------------------------------------------------------------|
| pRLG15229 | 8144 | GGCCCTTTCGTCTTCAAGAATTC<br>CCGCTCGAGGCTTGAGGATC           | <i>R. sphaeroides</i><br><i>rpoZ</i> promoter, -68<br>to +62                                                                                         |
|           | 8145 | GGTCAGGTGGGACCCAAGCTTCA<br>ACGCAGTCTTCAACCGTCACG          |                                                                                                                                                      |
| pRLG15230 | 8146 | GGCCCTTTCGTCTTCAAGAATTC<br>GCGCCGGGGAAAGACAAGTGAT<br>AC   | <i>R. sphaeroides</i><br><i>tufA</i> promoter, -60<br>to +25                                                                                         |
|           | 8147 | GGTCAGGTGGGACCCAAGCTTC<br>GACACCGGACAGCCCGTTC             |                                                                                                                                                      |
| pRLG15472 | 8303 | GGCCCTTTCGTCTTCAAGAATTCT<br>CACCGCCCGATAGTGCTTC           | <i>R. sphaeroides</i><br><i>tRNA-val</i><br>( <i>RSP_4309</i> )<br>promoter, -79 to<br>+47                                                           |
|           | 8304 | GGTCAGGTGGGACCCAAGCTTCA<br>CACCTGTTCCGCGCGAG              |                                                                                                                                                      |
| pRLG15474 | 8309 | GGCCCTTTCGTCTTCAAGAATTC<br>CCTATAAAAATAGGCGTATCACG<br>AGG | Inducible<br>pT7A1lacO34<br>promoter, -102 to<br>+31 IPTG<br>inducible promoter<br>in pIND4 (5) (for<br>overexpression in<br><i>R. sphaeroides</i> ) |
|           | 8310 | GGTCAGGTGGGACCCAAGCTTG<br>ATGTGTGAAATTGTTATCCGCTC         |                                                                                                                                                      |
| pRLG15601 | 8569 | GGCCCTTTCGTCTTCAAGAATTC<br>GATGCTGTGAAAAGGCCGATGG         | <i>R. sphaeroides</i><br><i>acpP</i> promoter,<br>-89 to +46                                                                                         |
|           | 8570 | GGTCAGGTGGGACCCAAGCTTCA<br>GGCAACTGGTGCAGTTCAG            |                                                                                                                                                      |
| pRLG15602 | 8573 | GGCCCTTTCGTCTTCAAGAATTC<br>GGTCGGACGTCCCTGCACTG           | <i>R. sphaeroides</i><br><i>comL</i> promoter,<br>-88 to +35                                                                                         |
|           | 8574 | GGTCAGGTGGGACCCAAGCTTC<br>CTCTGCCCGTCAGACCATAG            |                                                                                                                                                      |
| pRLG15604 | 8581 | GGCCCTTTCGTCTTCAAGAATTC<br>GGTGCTCCTTGCGACATGATCTT<br>C   | <i>R. sphaeroides</i><br><i>ilvE1</i> promoter,<br>-95 to +80                                                                                        |
|           | 8582 | GGTCAGGTGGGACCCAAGCTTCA<br>TGTCACCCTCCTGCGCATAG           |                                                                                                                                                      |
| pRLG15606 | 8589 | GGCCCTTTCGTCTTCAAGAATTC<br>GTCCGGGGGCTCTACAGGATTC         | <i>R. sphaeroides</i><br><i>RSP_1486</i><br>promoter,<br>-78 to +30                                                                                  |
|           | 8590 | GGTCAGGTGGGACCCAAGCTTGT<br>CCGTGCGCTGTCGTCATTG            |                                                                                                                                                      |
| pRLG15607 | 8591 | GGCCCTTTCGTCTTCAAGAATTC<br>CAGACAGCGGTCGCGGATGAG          | <i>R. sphaeroides</i><br><i>RSP_3110</i><br>promoter,<br>-90 to +72                                                                                  |
|           | 8592 | GGTCAGGTGGGACCCAAGCTTC<br>GAGCATGTCGGCGACCTTTC            |                                                                                                                                                      |

|           |      |                                                        |                                                               |
|-----------|------|--------------------------------------------------------|---------------------------------------------------------------|
| pRLG15611 | 8603 | GGCCCTTTCGTCTTCAAGAATTC<br>GTCTTCTCCGCTGTGGCGAAATG     | <i>R. sphaeroides</i><br><i>rho</i> promoter,<br>-94 to +110  |
|           | 8604 | GGTCAGGTGGGACCCAAGCTTG<br>AGGTTGAGACGTTTCGTTTCATGGC    |                                                               |
| pRLG15613 | 8571 | GGCCCTTTCGTCTTCAAGAATTC<br>GCGGAGGACCAAGGAAACAATG<br>G | <i>R. sphaeroides</i><br><i>atpH</i> promoter,<br>-91 to +49  |
|           | 8572 | GGTCAGGTGGGACCCAAGCTTCA<br>GAGGCATTGTATGGC GCGAG       |                                                               |
| pRLG15619 | 8597 | GGCCCTTTCGTCTTCAAGAATTC<br>GATTGCGTGCGTTCGACGGTTTTTC   | <i>R. sphaeroides</i><br><i>putR</i> promoter,<br>-100 to +40 |
|           | 8598 | GGTCAGGTGGGACCCAAGCTTG<br>GTCGATGGGGTCCAGTTTCGATC      |                                                               |

### Mutagenic primers for construction of transcription templates

| Plasmid   | Oligo | Sequence (mutations are in lowercase)        | Description                                                                              |
|-----------|-------|----------------------------------------------|------------------------------------------------------------------------------------------|
| pRLG14563 | 7364  | TGCGGTTCCCTAGATtGC<br>GCCTCACCGAAGC          | <i>R. sphaeroides rrnA</i><br>A-7T promoter                                              |
| pRLG14565 | 7365  | CCGTCTGCTCCTAGAAtC<br>CGCTTCACCGAGACG        | <i>R. sphaeroides rrnB</i><br>A-7T promoter                                              |
| pRLG14567 | 7364  | TGCGGTTCCCTAGATtGC<br>GCCTCACCGAAGC          | <i>R. sphaeroides rrnC</i><br>A-7T promoter                                              |
| pRLG15180 | 8148  | CGCCCGGGGCCGTCTTg<br>tgCTAGAAACCGCTTCAC      | <i>R. sphaeroides rrnB</i><br>ext-10 promoter<br>( to -17 to -14 TGTG)                   |
| pRLG15181 | 8149  | CCAAAAATCCGCTTGac<br>aCCGGGGCCGTCTGCTC       | <i>R. sphaeroides rrnB</i> -35<br>consensus promoter                                     |
| pRLG15182 | 8150  | GTCTGCTCCTAGAAACat<br>aTTCACCGAGACGAAGA<br>C | <i>R. sphaeroides rrnB</i><br>discriminator mutant<br>promoter (-5 to -3, CCG<br>to ATA) |
| pRLG15183 | 8151  | GTCTGCTCCTAGAAAggG<br>CTTCACCGAGACGAAG       | <i>R. sphaeroides rrnB</i><br>discriminator mutant<br>promoter (-6 to -5, CC to<br>GG)   |
| pRLG15185 | 8153  | CTTGCGCCCGGGGCCG<br>aTCTGCTCCTAGAAACC<br>G   | <i>R. sphaeroides rrnB</i><br>promoter with 18 bp<br>spacer. insertion of A at<br>-21    |
| pRLG15186 | 8154  | CCGCTTGCGCCCGGGG<br>CGTCTGCTCCTAGAAAC<br>C   | <i>R. sphaeroides rrnB</i><br>promoter with 16 bp<br>spacer, deletion of C at<br>-21     |

|           |      |                                                                          |                                                                                            |
|-----------|------|--------------------------------------------------------------------------|--------------------------------------------------------------------------------------------|
| pRLG15350 | 8287 | GGCCGTCTGCTCCTtGA<br>AACCGCTTCACC                                        | <i>R. sphaeroides rrnB</i><br>promoter mutant, A-11T                                       |
| pRLG15351 | 8288 | GGCCGTCTGCTCCTgGA<br>AACCGCTTCACC                                        | <i>R. sphaeroides rrnB</i><br>promoter mutant, A-11G                                       |
| pRLG15352 | 8289 | GCCGTCTGCTCCTAtAAA<br>CCGCTTCACCG                                        | <i>R. sphaeroides rrnB</i><br>promoter mutant, G-10T                                       |
| pRLG15485 | 8383 | TGCGGGTTTTTTTTGCGG<br>TgtgCTAGATAGCGCCTC<br>ACCG                         | <i>R. sphaeroides rrnA</i> ,<br>ext-10 promoter mutant<br>GTG from -16 to -14              |
| pRLG15488 | 8376 | GGGCGGCCGTTACATtG<br>GCCGCTC                                             | <i>R. sphaeroides rpoZ</i><br>promoter mutant, A-7T                                        |
| pRLG15489 | 8377 | GAGGCGGGGCGGcTgCt<br>ACATAGGCCGCT                                        | <i>R. sphaeroides rpoZ</i><br>ext-10 consensus<br>TGC from -15 to -13                      |
| pRLG15490 | 8378 | GGGGCAAAGCCCATAG<br>ATtACGGCGTCCC                                        | <i>R. sphaeroides rpsM</i><br>promoter mutant, C-7T                                        |
| pRLG15491 | 8379 | GGCCGGGGCAAAGCtg<br>cTAGATCACGGCGTCC                                     | <i>R. sphaeroides rpsM</i><br>ext-10 consensus,<br>TGC from -15 to -13                     |
| pRLG15505 | 8381 | TCTCTTCGTCATTTTTCC<br>TCTTGCGGccggggccGCG<br>GTTCCCTAGATAGCGCC<br>TCACCG | <i>R. sphaeroides rrnA</i><br>promoter, CCGGGGCC<br>spacer substitution from<br>-29 to -22 |

**Table S3. Plasmids used for in vitro transcription**

| <b>Plasmids</b> | <b>Promoter<sup>a</sup></b>                                          | <b>Endpoints<sup>b</sup></b> | <b>Source</b> |
|-----------------|----------------------------------------------------------------------|------------------------------|---------------|
| pRLG770         | No promoter                                                          |                              | (21)          |
| pRLG1616        | <i>E. coli rrnB (rrnB P1)</i>                                        | -88 to +50                   | (21)          |
| pRLG593         | <i>lacUV5</i>                                                        | -59 to +38                   | (22)          |
| pRLG3265        | <i>RNA I</i>                                                         | -61 to +1                    | (22)          |
| pRLG14562       | <i>R. sphaeroides rrnA</i>                                           | -320 to +50                  | This study    |
| pRLG14563       | <i>R. sphaeroides rrnA A-7T</i>                                      | -320 to +50                  | This study    |
| pRLG14564       | <i>R. sphaeroides rrnB</i>                                           | -230 to +50                  | This study    |
| pRLG14565       | <i>R. sphaeroides rrnB A-7T</i>                                      | -230 to +50                  | This study    |
| pRLG14566       | <i>R. sphaeroides rrnC</i>                                           | -270 to +50                  | This study    |
| pRLG14567       | <i>R. sphaeroides rrnC A-7T</i>                                      | -270 to +50                  | This study    |
| pRLG15054       | <i>R. sphaeroides prrA</i>                                           | -379 to +51                  | This study    |
| pRLG15224       | <i>R. sphaeroides rpsL</i>                                           | -132 to +65                  | This study    |
| pRLG15227       | <i>R. sphaeroides tRNA<sup>trp</sup> (RSP_4298)</i>                  | -106 to +56                  | This study    |
| pRLG15228       | <i>R. sphaeroides rpsM</i>                                           | -156 to +50                  | This study    |
| pRLG15229       | <i>R. sphaeroides rpoZ</i>                                           | -68 to +62                   | This study    |
| pRLG15230       | <i>R. sphaeroides tufA</i>                                           | -60 to +25                   | This study    |
| pRLG15350       | <i>R. sphaeroides rrnB A-11T</i>                                     | -230 to +50                  | This study    |
| pRLG15351       | <i>R. sphaeroides rrnB A-11G</i>                                     | -230 to +50                  | This study    |
| pRLG15352       | <i>R. sphaeroides rrnB G-10T</i>                                     | -230 to +50                  | This study    |
| pRLG15472       | <i>R. sphaeroides tRNA<sup>val</sup> (RSP_4309)</i>                  | -79 to +47                   | This study    |
| pRLG15474       | <i>T7A1lacO34 =A1lacO-1</i>                                          | -102 to +31                  | (8)           |
| pRLG15485       | <i>R. sphaeroides rrnA</i> , ext-10 GTG -16 to -14                   | -320 to +50                  | This study    |
| pRLG15488       | <i>R. sphaeroides rpoZ A-7T</i>                                      | -68 to +62                   | This study    |
| pRLG15489       | <i>R. sphaeroides rpoZ</i> ext-10 TGC -15 to -13                     | -68 to +62                   | This study    |
| pRLG15490       | <i>R. sphaeroides rpsM C-7T</i>                                      | -156 to +50                  | This study    |
| pRLG15491       | <i>R. sphaeroides rpsM</i> ext-10 TGC -15 to -13                     | -156 to +50                  | This study    |
| pRLG15505       | <i>R. sphaeroides rrnA</i> CCGGGGCC from -29 to -22                  | -320 to +50                  | This study    |
| pRLG15507       | <i>R. sphaeroides ssrA</i>                                           | -71 to +55                   | This study    |
| pRLG15543       | <i>R. sphaeroides rrnB</i> full consensus UP element                 | -230 to +50                  | This study    |
| pRLG15601       | <i>R. sphaeroides acpP</i>                                           | -89 to +46                   | This study    |
| pRLG15602       | <i>R. sphaeroides comL</i>                                           | -88 to +35                   | This study    |
| pRLG15604       | <i>R. sphaeroides ilvE1</i>                                          | -95 to +80                   | This study    |
| pRLG15606       | <i>R. sphaeroides RSP_1486</i> (TetR transcription regulator family) | -78 to +30                   | This study    |
| pRLG15607       | <i>R. sphaeroides RSP_3110</i> (putative Glutathione S-transferase)  | -90 to +72                   | This study    |
| pRLG15611       | <i>R. sphaeroides rho</i>                                            | -94 to +110                  | This study    |

|           |                            |             |            |
|-----------|----------------------------|-------------|------------|
| pRLG15613 | <i>R. sphaeroides atpH</i> | -91 to +49  | This study |
| pRLG15619 | <i>R. sphaeroides putR</i> | -100 to +40 | This study |

<sup>a</sup> Promoters are named for the first gene in the operon

<sup>b</sup> endpoints are relative to the predicted transcription start site (unless previously published otherwise in the indicated source)

**Table S4. Primers used to construct chromosomally-encoded C-terminal thrombin-His<sub>10</sub> tagged β'**

**1. Insertion of *rpoC* chromosomal fragment into pk18mobsacB (pRLG14688)**

**Primers to isolate *rpoC* chromosomal fragment**

| Oligo | Sequence               |
|-------|------------------------|
| 7576  | GCCGCCAGTCGATCGG       |
| 7577  | AGGCGAACCTTGGCGACCTTAC |

**Primers to linearized pK18mobsacB**

| Oligo | Sequence                                             |
|-------|------------------------------------------------------|
| 7578  | CGCTATGCGTAAGGTCGCCAAGGTTGCCTAAGCTTGG<br>CACTGGCCGTC |
| 7579  | CGTACCCGGTTCGCCGATCGACTGGGCGGCGGATCCC<br>CGGGTACCGAG |

**Primers to confirm 3 kb insert in pK18mobsacB**

| Oligo | Sequence              |
|-------|-----------------------|
| 7584  | CACTCATTAGGCACCCCAGGC |
| 7585  | CGCCAGGGTTTTCCCAGTCAC |

**2. Creation of C-terminally tagged *rpoC* with thrombin-His<sub>10</sub> in pK18mobsacB (pRLG14713)**

**Primers to linearize pK18mobsacB with *rpoC* chromosomal fragment**

| Oligonucleotide | Sequence           |
|-----------------|--------------------|
| 7594            | CCTGACCATGGGCCCCGC |
| 7595            | CAGCCCCGAGTCCTCGG  |

**Primers to introduce thrombin-His<sub>10</sub> into *rpoC* C-terminus (Region of complementarity is underlined)**

| Oligonucleotide | Sequence                                                                                          |
|-----------------|---------------------------------------------------------------------------------------------------|
| 7588            | CCGAGGACTCGGGGCTGGTGGAAACGGTGGAGAACC <sup>CGCGAG</sup><br>GAGCTGGTGCCGCGCGGCAGCCATCACCACCATCATCAC |
| 7589            | TGCGCGGGCCCATGGTCAGGCGAGAGAGGGGAGGATTAATG<br>GTGGTGATGGT <u>GATGATGGTGGT</u> GATGGC               |

**Primers to confirm insertion of thrombin-His<sub>10</sub> tag onto *rpoC* C-terminus**

| Oligo | Sequence              |
|-------|-----------------------|
| 7598  | ATGATGGTGGTGGTGGCTGCC |
| 7431  | GCGTCAAGAAGATCGCGCAC  |

**Primers to sequence RLG14713 and RLG14765**

| Oligo | Sequence                |
|-------|-------------------------|
| 7431  | GCGTCAAGAAGATCGCGCAC    |
| 7432  | GTGATCCCGAGCAGGATCGGTTC |
| 7512  | TGCCGATCATCGCCGAGAAGG   |
| 7513  | GAACCGATCCTGCTCGGGATC   |
| 7515  | CGGGTTGCCGTCCATGATG     |
| 7516  | GCCAGTCGGACACGATCTTCTG  |
| 7584  | CACTCATTAGGCACCCCAGGC   |
| 7594  | CCTGACCATGGGCCCGC       |
| 7602  | CGAGAGTCGCACGAAATCCTCC  |
| 7612  | GGGCCTCTTCGCTATTACGCC   |
| 7615  | CGTGCTGAAGGAGCCACTGG    |
| 7616  | CCCTCCGACTCCCCCTATACG   |
| 7617  | GCGCCAGATCGTGAAGAGC     |
| 7618  | CGTACGATGAGCAGGACGCC    |

**Primers to amplify crossover region in RLG14765**

| Oligo | Sequence                   |
|-------|----------------------------|
| 7511  | GCTCACCTGTGAAGCGGAAGAG     |
| 7654  | GATCTTTGACACCCTGGGTATCGAGG |

**Table S5. Gene blocks used in this study**

| Plasmid   | Sequence <sup>a</sup>                                                                                                                                                                                                                  | Description                                                                                     |
|-----------|----------------------------------------------------------------------------------------------------------------------------------------------------------------------------------------------------------------------------------------|-------------------------------------------------------------------------------------------------|
| pRLG15507 | <b>CACGAGGCCCTTTCGTCTTCAAGAATTCTG</b><br>CCCCACGGATCCGCCCCGGCACGCCTGCG<br><u>GCCGCTTGCGGAGGCCGCCCTCCCGCCT</u><br><u>ATATTCCGCCTGTCCGGGGCAACCCGGACT</u><br>ATGGACATAAACGCGCTCGTCATAAGCGGA<br>TCGGACAAGCTTGGGTCCACCTGACCCC<br><b>ATG</b> | <i>R. sphaeroides</i> <i>ssrA</i><br>promoter -71 to +55                                        |
| pRLG15543 | <b>GGCCCTTTCGTCTTCAAGAATTCG</b> <sub>gaaaattttt</sub><br>tcaaaaagtaCTTGCGCCCGGGGCCGTCTGCT<br><u>CCTAGAAACCGCTTCACCGAGACGAAGACC</u><br>GGCAGCGCCGGACGGAGACGAGGGAGCG<br>GATGACAGAAGCTTGGGTCCACCTGACC                                     | <i>R. sphaeroides</i> <i>rrnB</i><br>promoter with full<br>consensus UP<br>element (-36 to +50) |

**Gene block for CarD (*RSP\_2425*)**

| Plasmid   | Sequence                                                                                                                                                                                                                                                                                                                                                                                                                                                                                                                                                                                                     | Description                                                                                                                   |
|-----------|--------------------------------------------------------------------------------------------------------------------------------------------------------------------------------------------------------------------------------------------------------------------------------------------------------------------------------------------------------------------------------------------------------------------------------------------------------------------------------------------------------------------------------------------------------------------------------------------------------------|-------------------------------------------------------------------------------------------------------------------------------|
| pRLG15433 | <b>ATGACCAAACCAAACAAACCGGAATTTTCGT</b><br>CCGAATGAGTTTGTGTTTATCCGGCACAT<br>GGTGTGGGTCGTATTATTAGCATTGAAGAA<br>CAAGAAATTGCCGGTATTCGTCTGGAAGT<br>TTTGTGATCAGCTTCGAGAAAGATAAAATGA<br>CCCTGCGTGTTCCGACCCATAAAGCAACCG<br>AAGTTGGTATGCGTAGCCTGAGCACACCGG<br>ATGTTGTTACCAAAGCACTGGATAACCTGA<br>AAGGTAAAGCACGTGTGAAACGTGCAATGT<br>GGTCACGTCGTGCACAAGAATATGAACAGA<br>AAATTAACAGCGGTGATCTGATGAGCATTG<br>CCGAAGTTGTTTCGTGATCTGCATCGTACCG<br>ATGATCAGCGTGAACAGAGCTATAGCGAAC<br>GTCAGCTGTATGAAGCAGCACTGGAACGTC<br>TGACCCGTGAAGTTGCAGCAGTTAGCGGTG<br>TTGATGAAGCCGGTGCACAGAAAGCAGTTG<br><b>ATGCAGTTCTGGTTAGCCGTGCAGCATAA</b> | Sequence of codon<br>optimized<br>(GeneArt, Life<br>Technologies) <i>R.</i><br><i>sphaeroides</i><br>CarD ( <i>RSP_2425</i> ) |

<sup>a</sup> Promoter sequences in these plasmids were gene blocks (IDT) inserted into RLG770 by HiFi Assembly (NEB). Sequence homology to RLG770 is in boldface. -35 element to -10 element is underlined. Consensus UP element introduced into *R. sphaeroides* *rrnB* promoter is shown in lowercase. Start and stop codons of CarD are in boldface.



**Table S6. Primers used to construct pETSUMO-CarD**

**Primers to linearize pETSUMO (pRLG14641)**

| Oligo | Sequence                   |
|-------|----------------------------|
| 7369  | TCGTAACAAAGCCCGAAAGGAAGCTG |
| 7659  | TCCACCAATCTGTTCTCTGTGAGCC  |

**Primers to PCR amplify CarD with sequence overlapping pETSUMO**

| Plasmid   | Oligo | Sequence                                                   | Description                                                                                          |
|-----------|-------|------------------------------------------------------------|------------------------------------------------------------------------------------------------------|
| pRLG15433 | 7660  | ACAGAGAACAGATTGGTGGA<br>ATGACCAAACCAAACAAACC<br>GGAATTTTCG | Primers to amplify codon optimized CarD, which generates overlapping sequence to pETSUMO (pRLG14641) |
|           | 7661  | CCTTTCGGGCTTTGTTACGA<br>TTATGCTGCACGGCTAACCA<br>GAAC       |                                                                                                      |

**Primers to sequence pETSUMO-CarD (pRLG15433)**

| Oligo | Sequence                  |
|-------|---------------------------|
| 7386  | ACGCTGCGCGTAACCACC        |
| 7837  | GACAGGGTAAGGAAATGGACTCC   |
| 7839  | GCGTGAACAGAGCTATAGCGAACG  |
| 4583  | GGTGATGTCGGCGATATAGGC     |
| 7840  | CATCCGGTGTGCTCAGGCTAC     |
| 7838  | GGTGTCCGATGGATCTTCAGAGATC |

**Mutagenic primers to construct CarD variants**

| Plasmid   | Oligo | Sequence                                                        | Description                          |
|-----------|-------|-----------------------------------------------------------------|--------------------------------------|
| pRLG15053 | 8058  | GTGTGAAACGTGCAATGGCGT<br>CACGTCGTGCACAAG                        | CarD W91A substitution               |
| pRLG15434 | 8195  | TGTGAAACGTGCAATGTTGTCA<br>CGTCGTGCACAAG                         | CarD W91L substitution               |
| pRLG15435 | 8190  | TGGTGTGGGTCGTATTATTAGC<br>ATTGAAGAAGCAGAAGCTGCC<br>GGTATTCGTCTG | CarD Q31A/I33A/<br>R53A substitution |
|           | 8191  | GAAAGATAAAATGACCCTGGCT<br>GTTCCGACCCATAAAGCA                    |                                      |

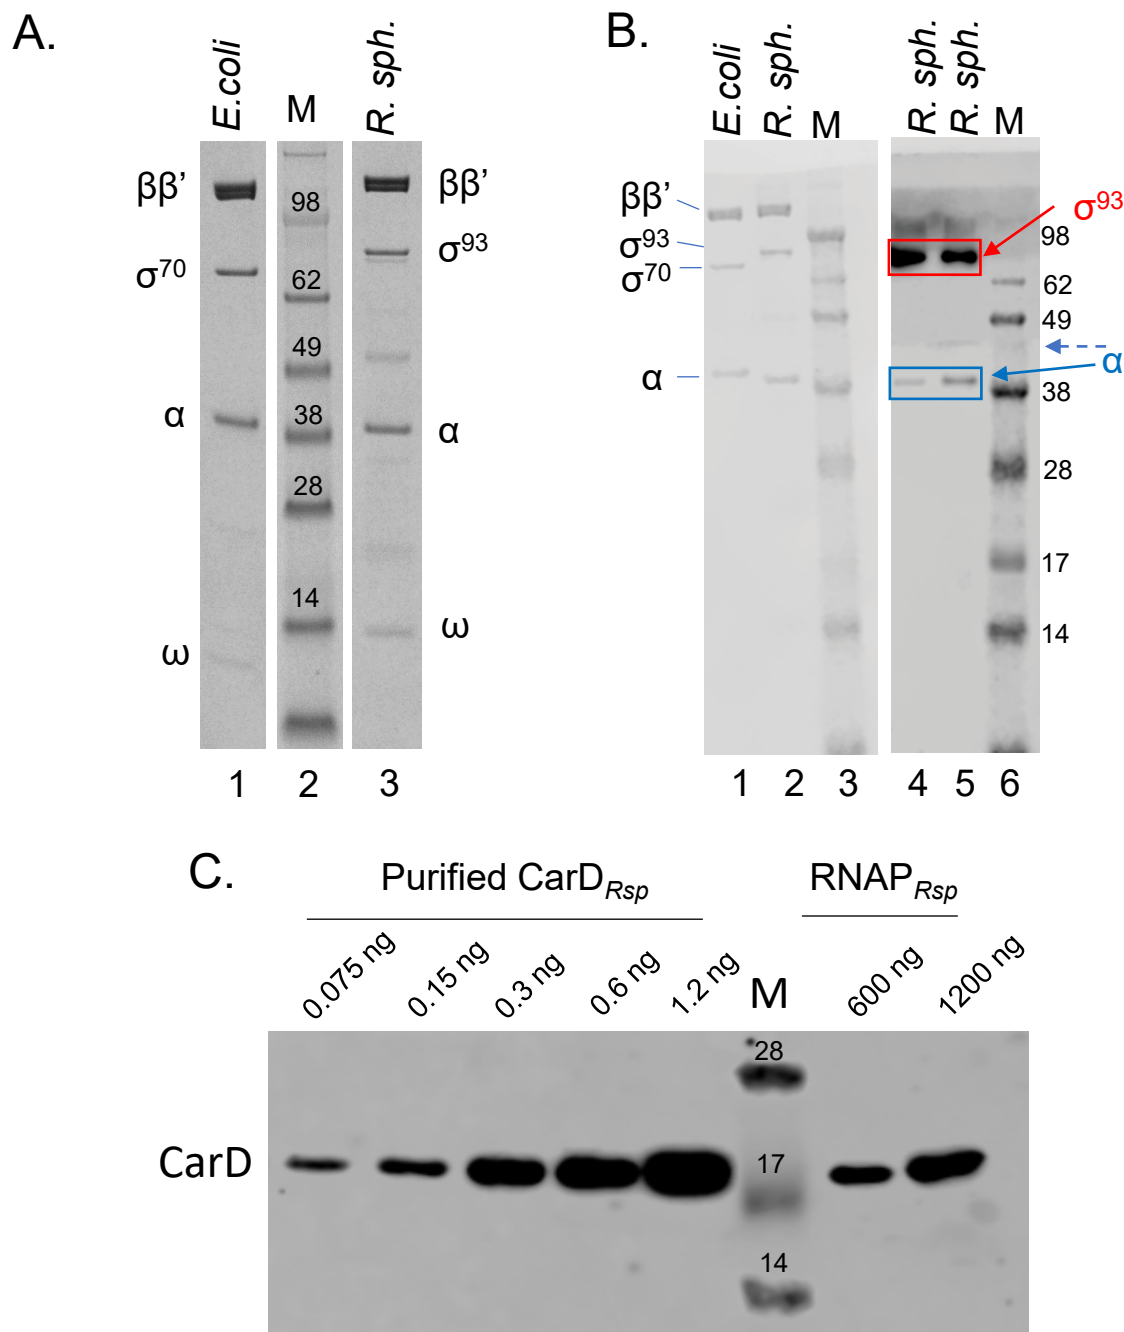

**Fig. S1.** RNAP purification. (A) 1.0  $\mu\text{g}$  purified *E. coli* RNAP (lane 1) or *R. sphaeroides* RNAP (lane 3) run on a 4-12% Invitrogen NuPAGE Bis-Tris gel with MES buffer. MW (kDa) of See Blue 2 size markers (Invitrogen, lane 2) are indicated above bands. Intervening lanes were removed for clarity. (B) All lanes are from the same gel (12% NuPAGE Bis-Tris/MES). Lanes 1-3 were Coomassie stained. Lanes 1 and 2, 1  $\mu\text{g}$  of the indicated RNAP. Lane 3, Size marker as in (A). Lanes 4-6, Western blot of purified RNAP<sub>Rsp</sub> to detect  $\sigma$  and  $\alpha$  subunits. Lane 4, 10 ng RNAP<sub>Rsp</sub>. Lane 5, 20 ng RNAP<sub>Rsp</sub>. Lane 6, marker as in (A). Top portion of blot (above dotted arrow) was probed with anti- $\sigma^{70}$  antibody WI168. Lower portion of blot was probed with anti- $\alpha$  antibody (WI515). All lanes (1-6) were visualized by Li-COR imaging. (C) Western blot with anti-Card<sub>Rsp</sub> antibody, using indicated amounts of purified Card<sub>Rsp</sub> or purified RNAP<sub>Rsp</sub>. The RNAP:Card molar ratio was 126:1. Marker (M) is the same as in (A).

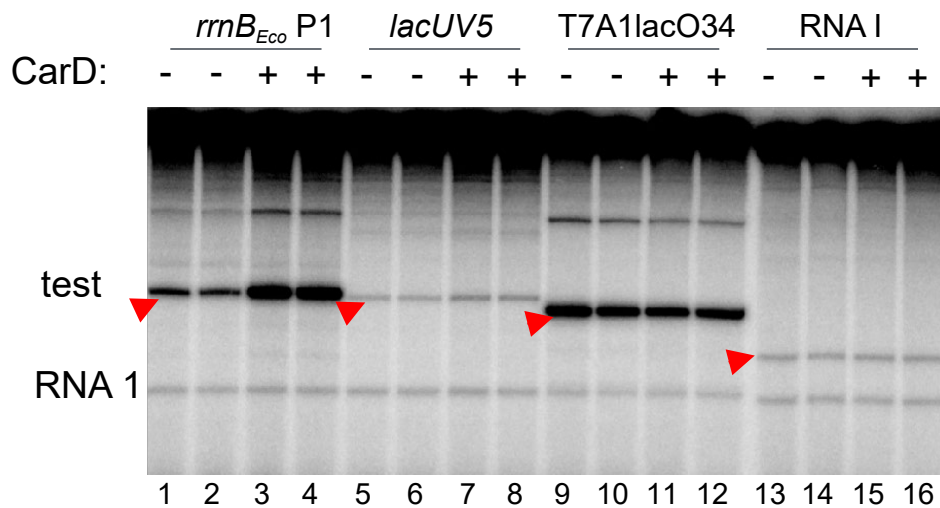

**Fig. S2.** Transcription of non-*R. sphaeroides* promoters with 20 nM RNAP<sub>Rsp</sub>. Buffer contained 170 mM NaCl. Only *E. coli rrnB* P1 was activated by CarD<sub>Rsp</sub>. Promoter fragments were inserted upstream of the *rrnB* P1 terminator to produce the transcripts indicated by the red arrowheads. RNA 1 is encoded where indicated the CarD concentration was 1280 nM. d by the plasmid template (see *Expanded Materials and Methods*). The *lacUV5* promoter is a variant of the *E. coli lac* promoter. The *T7A1lacO34* promoter is a variant of the phage T7A1 promoter (see *Expanded Materials and Methods*). In lanes 13-16, the template contains the RNA I promoter inserted upstream of the *rrnB* T1 terminator, so that RNA I is transcribed from both its native location in the plasmid and also from the site of fragment insertion.

|                                                     |                      |
|-----------------------------------------------------|----------------------|
| CTTGCGGGTTTTTTTTGCGGTTCCCTAGAT <u>A</u> GCGCCTCACCG | Rsph_2.4.1_rrnA      |
| CTTGCGCCCCGGGGCCGTCTGCTCCTAGAA <u>A</u> CCGCTTCACCG | Rsph_2.4.1_rrnB      |
| CTTGCGGGTTTTTTTTGCGGTTCCCTAGAT <u>A</u> GCGCCTCACCG | Rsph_2.4.1_rrnC      |
| CTTGCGGTGCCCCGAGAGAGCGCCTAGAT <u>A</u> GCGCCTCACCG  | Rsph_ATCC_17025_rrnA |
| CTTGCGGGTTTTTTTTGTGGTTCCCTAGAT <u>A</u> GCGCCTCACCG | Rsph_ATCC_17025_rrnB |
| CTTGCGAGACCGGGGCGACTGCCCTAAAA <u>A</u> CCGCTTCACCG  | Rsph_ATCC_17025_rrnC |
| CTTGCGGGTTTTTTTTGTGGTTCCCTAGAT <u>A</u> GCGCCTCACCG | Rsph_ATCC_17025_rrnD |
| CTTGCGGGTTTTTTTTGCGGTTCCCTAGAT <u>A</u> GCGCCTCACCG | Rsph_ATCC_17029_rrnA |
| CTTGCGGGTTTTTTTTGTGGTTCCCTAGAT <u>A</u> GCGCCTCACCG | Rsph_ATCC_17029_rrnB |
| CTTGCGCGGGCCGTCTGCTCCCCGTAGAA <u>A</u> CCGCTTCACCG  | Rsph_ATCC_17029_rrnC |
| CTTGCGGGTTTTTTTTGCGGTTCCCTAGAT <u>A</u> GCGCCTCACCG | Rsph_ATCC_17029_rrnD |
| CTTGCGGGTTTTTTTTGCGGTTCCCTAGAT <u>A</u> GCGCCTCACCG | Rsph_KD131_rrnA      |
| CTTGCGGGTTTTTTTTGCGGTTCCCTAGAT <u>A</u> GCGCCTCACCG | Rsph_KD131_rrnB      |
| CTTGCGCCCCGGGGCCGTCTGCTCCTAGAA <u>A</u> CCGCTTCACCG | Rsph_KD131_rrnC      |
| CTTGCGGGTTTTTTTTGTGGTTCCCTAGAT <u>A</u> GCGCCTCACCG | Rsph_KD131_rrnD      |
| CTTGCGGGTTTTTTTTGCGGTTCCCTAGAT <u>A</u> GCGCCTCACCG | Rsph_WS8N_rrnA       |
| CTTGCGCCCCGGGGCCGTCTGCTCCTAGAA <u>A</u> CCGCTTCACCG | Rsph_WS8N_rrnB       |
| CTTGCGGGTTTTTTTTGCGGTTCCCTAGAT <u>A</u> GCGCCTCACCG | Rsph_WS8N_rrnC       |
| CTTGCGGGTTTTTTTTGCGGTTCCCTAGAT <u>A</u> GCGCCTCACCG | Rsph_MBTJL-8_rrnA    |
| CTTGCGGGTTTTTTTTGCGGTTCCCTAGAT <u>A</u> GCGCCTCACCG | Rsph_MBTJL-8_rrnB    |
| CTTGCGCCCCGGGGCCGTCTGCTCCTAGAA <u>A</u> CCGCTTCACCG | Rsph_MBTJL-8_rrnC    |
| CTTGCGGGTTTTTTTTGCGGTTCCCTAGAT <u>A</u> GCGCCTCACCG | Rsph_MBTJL-13_rrnA   |
| CTTGCGGGTTTTTTTTGCGGTTCCCTAGAT <u>A</u> GCGCCTCACCG | Rsph_MBTJL-13_rrnB   |
| CTTGCGCCCCGGGGCCGTCTGCTCCTAGAA <u>A</u> CCGCTTCACCG | Rsph_MBTJL-13_rrnC   |

**Fig. S3:** *R. sphaeroides* rRNA promoter sequences. An A at position -7 (6th position of the -10 hexamer; highlighted in red) is present in each of the rRNA promoters (*rrnA*, *rrnB*, *rrnC*, and where present, *rrnD*) in six different *R. sphaeroides* strains. Genome sequences were obtained from NCBI. Strain accession numbers for Rsph 2.4.1: GCA\_003324715.1; Rsph\_ATCC\_17025: GCA\_000016405.1; Rsph\_ATCC\_17029: GCA\_000015985.1; Rsph\_KD131: GCA\_000021005.1; Rsph\_WS8N: GCA\_000212605.1; Rsph\_MBTJL-8: GCA\_001576595.1; Rsph\_MBTJL-13: GCA\_001685625.1.



**A**

|     |                                                                |     |
|-----|----------------------------------------------------------------|-----|
| Tth | -----MKEFRPGDKVVLPPYGVGVVAGIAQRSVSGVSRAYYQVDFPGSRSKAYVPVEAPH   | 55  |
| Myx | ----MQTSFKTGDKAVYPGQGVGEVMGIEHTEVAGQRQSFYVLRILENGMRIMIPINKVG   | 56  |
| Mtb | -----MIFKVGDTVVPYHHGAALVEAIEETRIKGEQKEYLVLKVAQGDLTVRVPAENAE    | 54  |
| Rsp | MTKTKKPEFRPNEFVVYPAHGVGRIISIEEQEIQAGIRLELFFVISFEKDKMTLRVPTHKAT | 60  |
| Ccr | -MSKTGLEFSVGDHVVYPAHGVGSIQAIETQEVAGMSLEVYVITFDHEKMTLRVPTKKAK   | 59  |
|     | * .: .* * *.. : .* : * : . : *                                 |     |
|     |                                                                |     |
| Tth | SVGLRKALAPEEVPVILDLLKNGR-MPLPKQWAARHRKTSEILADGNPYRIAQMAGQLRA   | 114 |
| Myx | SVGLREIISEEDVKQVYSILKEKDISVDSTTWNRRYREYMEKIKTGSVFEIAEVLRLDLYL  | 116 |
| Mtb | YVGVRDVVGQEGLDKVFQVLRAPH-TEEPTNWSRRYKANLEKLASGDVNVKVAEVVLDLWR  | 113 |
| Rsp | EVGMRSLSTPDVVTKALDTLKGKA-RVKRAMWSRRAQEYEQKINSGDLMSIAEVVLDLHR   | 119 |
| Ccr | TAGLRPLAEGGTVSQALTTLKGRA-RVKRTMWSRRAQEYEAKINSGDLISIAEVVLDLHR   | 118 |
|     | .*: * : * : * * : : * . :*: : *                                |     |
|     |                                                                |     |
| Tth | WEVERGLPDLDRQALRRAIHLLAEVAQSLEITVQEAKRLFEEAWGEEELN             | 164 |
| Myx | LKGDKDLDFGERKMLDTARSLLIKELSLAKDCSEDEIESDLKKIFNLA--             | 164 |
| Mtb | RDQERGLSAGEKRM LAKARQILVGELALAESTDDAKAETILDEVLAAAS-            | 162 |
| Rsp | TDDQREQSYSERQLYEALERLTREVAAVSGVDEAGAQAQKAVDAVLVSRAA            | 169 |
| Ccr | AENQPEQSYSERQLYESALDRMAREVAAIERIDREAAIGILTSLVKAA-              | 167 |

**B**

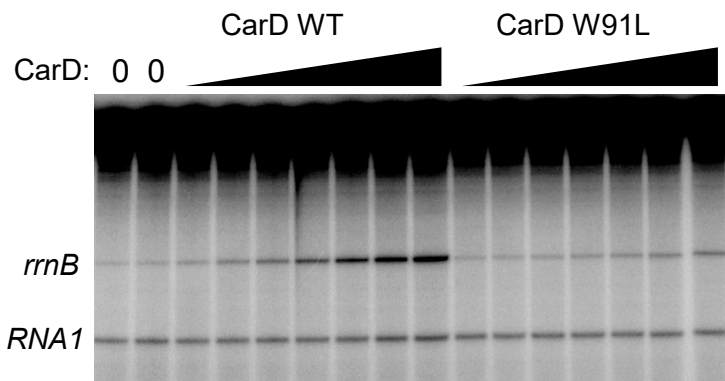

**C**

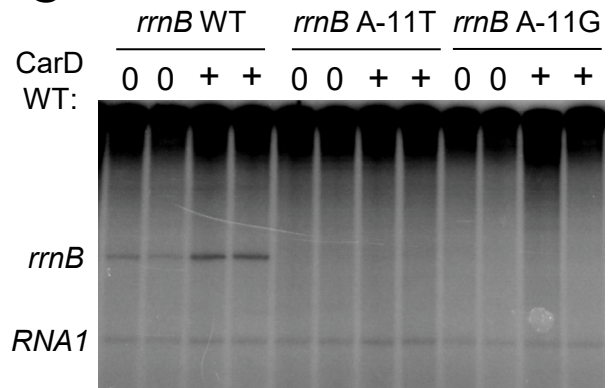

**Fig. S5.** Alignments of CarD, activation by wild-type or W91L mutant CarD<sub>Rsp</sub>, and transcription from *R. sphaeroides* *rrnB* -11 mutant promoters. (A) Alignments of CarD from *Thermus thermophilus* HB8, *Myxococcus xanthus* DK1622 (also referred to as CdnL), *Mycobacterium tuberculosis* H37Rv, *Rhodobacter sphaeroides* 2.4.1 and *Caulobacter crescentus* NA1000 (CdnL). Substitutions introduced into CarD<sub>Rsp</sub> are boxed (Q31A/I33A/R53A; W91A; W91L). W91 is conserved among the CarD homologs (4). (B) Activation of *rrnB*<sub>Rsp</sub> transcription by 20 nM RNAP<sub>Rsp</sub> with 20 nM to 1280 nM CarD<sub>Rsp</sub> WT or CarD<sub>Rsp</sub> W91L. (C) In vitro transcription of the *rrnB* wild type, A-11T or A-11G mutant promoters by 20 nM RNAP<sub>Rsp</sub> ± 1280 nM CarD<sub>Rsp</sub>. Buffer in (B) and (C) contained 170 mM NaCl.



## A. Promoters Activated by CarD

|                       | -35            | -10             | +1        |                    |
|-----------------------|----------------|-----------------|-----------|--------------------|
| AAAATTATTTTAAATTTCTC  | <b>TTGTCAG</b> | <b>TATAAT</b>   | GCGCCACCA | <i>Eco rrnB P1</i> |
| GTCTCTTCGTCATTTTCTC   | <b>TTGCGG</b>  | <b>TAGATA</b>   | GCGCCTCA  | <i>Rsp rrnA</i>    |
| TACGGAGCCCAAAAATCCGC  | <b>TTGCGC</b>  | <b>TAGAAA</b>   | CCGCTTCA  | <i>Rsp rrnB</i>    |
| ATGCGGCTGTCATTTTCTC   | <b>TTGCGG</b>  | <b>TAGATA</b>   | GCGCCTCA  | <i>Rsp rrnC</i>    |
| GGCTGCCGCGGAAGCATCTG  | <b>TTGACA</b>  | <b>TATACG</b>   | CCGCCTAC  | <i>rpsL</i>        |
| CCGGGAAAGACAAGTGATAC  | <b>TTGATT</b>  | <b>GATAACTC</b> | CGCCGCCG  | <i>tufA</i>        |
| ACAGCCATGTGTCAACTTCCT | <b>TTGACG</b>  | <b>TATCAA</b>   | GCATCCAG  | <i>prpA</i>        |
| GCACGGGGCGCAACTTTGCAC | <b>TTGCGG</b>  | <b>TATCTC</b>   | GCGGCTGG  | <i>tRNA-trp</i>    |
| TTTCTAGCTCTCCAAAACCC  | <b>TTGAAC</b>  | <b>TATAGA</b>   | GCAGCCCA  | <i>tRNA-val</i>    |
| CGGGTGACTTTGCATCCGGCC | <b>TTGACG</b>  | <b>TAGATC</b>   | ACGGCGTC  | <i>rpsM</i>        |
| TGAGGATCAGGATTCCGCC   | <b>TTGTCA</b>  | <b>TACATA</b>   | GGCCGCTC  | <i>rpoZ</i>        |
| CCAGATTTTATGTCAGCCTTG | <b>TTGACT</b>  | <b>TACCGA</b>   | CAGCCCGT  | <i>ilvE1</i>       |
| GCCGAAGCCGTGCTTCATGG  | <b>TTGCGA</b>  | <b>TACACC</b>   | CGCCGCGA  | <i>atpH</i>        |
| ACTTTCGGCGCGGAAAGCGT  | <b>TTGCCT</b>  | <b>TATAGG</b>   | CCCGTCAG  | <i>acpP</i>        |
| GCGACGGGGCGCAAAGCGTT  | <b>TTGCGC</b>  | <b>TAGGAA</b>   | CCGGGCAA  | <i>comL</i>        |
| TGAGCCCCCGGCCAAGATCA  | <b>TTGACT</b>  | <b>TATGTG</b>   | CGGCCTTG  | <i>rho</i>         |

## B. Promoters Not Activated by CarD

|                        |                |               |          |                   |
|------------------------|----------------|---------------|----------|-------------------|
| CCCCGGCAGCCTGCGGCCGC   | <b>TTGCGG</b>  | <b>TATATT</b> | CCGCCTGT | <i>ssrA</i>       |
| TGAAGGGGGCGCGGGTTCCT   | <b>TTGACAT</b> | <b>TATCAA</b> | CATAACAA | <i>RSP_3110</i>   |
| CGGCCACGCTGTATAGCGG    | <b>TTGACG</b>  | <b>TACGTT</b> | AAGGCCCT | <i>RSP_1486</i>   |
| CGACGCCCTCCGCAAACATTA  | <b>TTGCGC</b>  | <b>TAGAAT</b> | CTCCCCGC | <i>putR</i>       |
| CACTCATTAGGCACCCCAGGCT | <b>TTTACAC</b> | <b>TATAAT</b> | GTGTGGA  | <i>lacUV5</i>     |
| GTAGGCGGTGCTACAGAGTTCT | <b>TTGAAGT</b> | <b>TACACT</b> | AGAAGGA  | <i>RNA1</i>       |
| GAAAATTTATCAAAAAGAGTG  | <b>TTGACT</b>  | <b>GATACT</b> | TAGATTC  | <i>T7A1lacO34</i> |

**Fig. S7.** *R. sphaeroides* promoter sequences. (A) Promoter sequences (~-60 to +1) from 15 CarD-activated *R. sphaeroides* promoters and *E. coli rrnB P1*, which is activated by CarD when transcribed by *R. sphaeroides* RNAP but not by *E. coli* RNAP (see also Fig. S2). (B) Promoter sequences of 4 *R. sphaeroides* promoters and 3 *E. coli* promoters (in blue) whose activities are not altered by CarD. Positions corresponding to the -35 and -10 recognition motifs are in bold and boxed. For promoters with 18 bp spacing between the -35 and -10, the sequences are aligned with the -10 hexamer resulting in a shift of the -35 hexamer 1 bp further upstream.



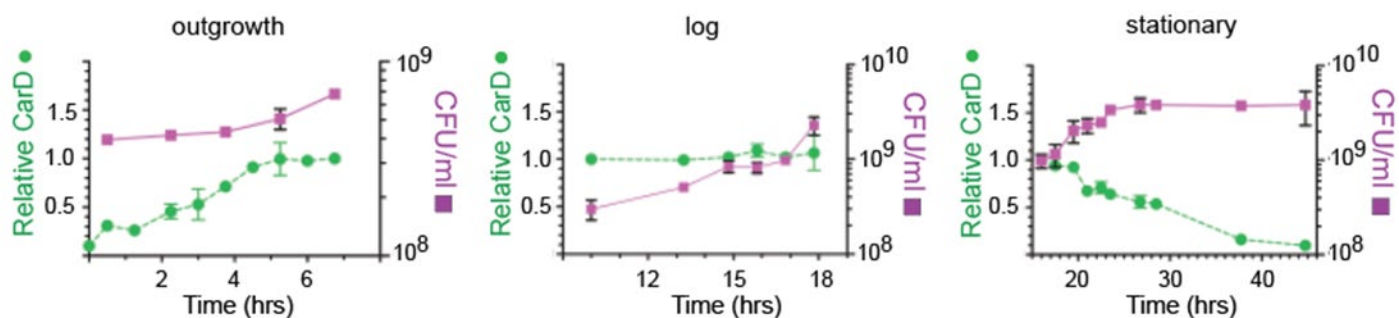

**Fig. S8.** Relative levels of  $\text{Card}_{Rsp}$  and CFU/ml in *R. sphaeroides* cultures during aerobic growth. Card levels and CFU/ml were determined in samples from outgrowth, log phase, and stationary phase cultures and plotted as a function of time after inoculation of the culture. Data in each panel represent average and range from 2 experiments. Outgrowth, log, and stationary phase samples were obtained in separate experiments. Representative Western blots and  $\text{OD}_{600}$  values for these experiments are shown in Fig. 7A.

#### **4. Legend for Dataset 1**

The spreadsheet contains the chromosome location (A), locus tag (B), gene name if known (C), proposed product (D), position of the transcription start site (E), whether the start site is on the + or – strand (F), promoter sequence from -20 to +1 corresponding to the TSS (G), the sequence of the predicted extended -10 and -10 hexamer (H), and the identity of the base at position -7 (I). Detailed information about the bioinformatic analysis is in Expanded Materials and Methods.

## 5. SI References

1. W.R. Sistrom, A requirement for sodium in the growth of *Rhodospseudomonas spheroides*, *J Gen Microbiol* **22**:778–785 (1960).
2. A. Schäfer *et al*, Small mobilizable multi-purpose cloning vectors derived from the *Escherichia coli* plasmids pK18 and pK19: selection of defined deletions in the chromosome of *Corynebacterium glutamicum*, *Gene* **145**:69–73 (1994).
3. R.R. Burgess, J.J. Jendrisak, Procedure for the rapid, large-scale purification of *Escherichia coli* DNA-dependent RNA polymerase involving polymin P precipitation and DNA-cellulose chromatography. *Biochemistry* **14**:4634–4638 (1975).
4. D.B. Srivastava *et al*, Structure and function of CarD, an essential mycobacterial transcription factor, *Proc Natl Acad Sci USA* **110**:12619-12624 (2013).
5. W. Ross, J.F. Thompson, J.T. Newlands, R.L. Gourse, *E.coli* Fis protein activates ribosomal RNA transcription in vitro and in vivo, *EMBO J* **9**:3733–3742 (1990).
6. Davison J., Mechanism of control of DNA replication and incompatibility in ColE1-type plasmids--a review. *Gene* **28**:1-15 (1984).
7. A.C. Ind *et al*, Inducible-Expression Plasmid for *Rhodobacter sphaeroides* and *Paracoccus denitrificans*, *Appl Environ Microbiol* **75**:6613–6615 (2009).
8. R. Lutz H. Bujard, Independent and tight regulation of transcriptional units in *Escherichia coli* via the LacR/O, the TetR/O and AraC/I1-I2 regulatory elements. *Nucleic Acids Res* **25**:1203-1210 (1997).
9. K. Lemmer *et al*, The NtrYX two-component system regulates the gram-negative cell envelope, *mBio* **11**:e00957-20.
10. J.M. Vera *et al*, Genome-scale transcription–translation mapping reveals features of *Zymomonas mobilis* transcription units and promoters, *mSystems* **5**:e00250-20 (2020).
11. K.S. Myers *et al*, Genome-wide Identification of Transcription Start Sites for *Rhodobacter sphaeroides* Grown Aerobically and Photosynthetically, *ASM Microbiology Resource Announcements* (2020), in press.
12. T.L. Bailey *et al*, MEME SUITE: tools for motif discovery and searching. *Nucleic Acids Res* **37**:W202-8 (2009).

13. C. Mackenzie *et al*, The home stretch, a first analysis of the nearly completed genome of *Rhodobacter sphaeroides* 2.4.1. *Photosynth Res* **70**:19-41 (2001).
14. B. Zhou *et al*, The global regulatory architecture of transcription during the *Caulobacter* cell cycle, *PLoS Genet* **11**:e1004831 (2015).
15. M.K. Thomason *et al*, Global transcriptional start site mapping using differential RNA sequencing reveals novel antisense RNAs in *Escherichia coli*, *J Bacteriol* **197**:18–28 (2015).
16. E. Warman, D. Forrest, J.T. Wade, D.C. Grainger, Widespread divergent transcription from prokaryotic promoters, doi.org/10.1101/2020.01.31.928960doi: bioRxiv preprint first posted online Feb. 2, 2020.
17. X. Li *et al*, Transcriptome landscape of *Mycobacterium smegmatis*, *Front Microbiol* **8**:2505 (2017).
18. Y. Jeong *et al*, The dynamic transcriptional and translational landscape of the model antibiotic producer *Streptomyces coelicolor* A3(2), *Nat Commun* **7**:11605 (2016).
19. A.M. Sass *et al*, Genome-wide transcription start site profiling in biofilm-grown *Burkholderia cenocepacia* J2315, *BMC Genomics* **16**:775 (2015).
20. R. Simon, U. Priefer, A. Pühler, A broad host range mobilization system for in vivo genetic engineering: transposon mutagenesis in gram negative bacteria, *Nat Biotech* **1**:784–791 (1983).
21. W. Ross, S.E. Aiyar, J. Salomon, R.L. Gourse, *Escherichia coli* Promoters with UP elements of different strengths: modular structure of bacterial promoters, *J Bacteriol* **180**:5375–5383 (1998).
22. T. Gaal, M.S. Bartlett, W. Ross, C.L. Turnbough, R.L. Gourse, Transcription regulation by initiating NTP concentration: rRNA synthesis in bacteria, *Science* **278**: 2092–2097 (1997).
23. Y. Zuo, T.A. Steitz, Crystal structures of the *E. coli* transcription initiation complexes with a complete bubble, *Mol Cell* **58**:534-540 (2015).
24. A. Narayanan *et al*, Cryo-EM structure of *Escherichia coli*  $\sigma^{70}$  RNA polymerase and promoter DNA complex revealed a role of  $\sigma$  non-conserved region during the open complex formation, *J Biol Chem* **293**:7367-7375 (2018).
25. A. Feklistov, S.A. Darst, Structural basis for promoter -10 element recognition by the bacterial RNA polymerase  $\sigma$  subunit, *Cell* **147**:1257-1269 (2011).

26. Y. Zhang *et al*, Structural basis of transcription initiation, *Science* **338**:1076-1080 (2012).
27. B. Bae, A. Feklistov, A. Lass-Napiorkowska, R. Landick, S.A. Darst, Structure of a bacterial RNA polymerase holoenzyme open promoter complex, *eLife* **4**:e08504 (2015).
28. E.A. Hubin, M. Lilic, S.A. Darst, E.A. Campbell, Structural insights into the mycobacteria transcription initiation complex from analysis of X-ray crystal structures, *Nat Commun* **8**:16072 (2017).
29. B. Benoff *et al*, H. Yang, C.L. Lawson, G. Parkinson, J. Liu, E. Blatter, Y.W. Ebright, H.M. Berman, R.H. Ebright, Structural basis of transcription activation: the CAP-alpha CTD-DNA complex, *Science* **297**:1562-1566 (2002).
